# Supplementary material
Source: ML conference proceedings conference paper supplement (https://openreview.net/forum?id=fm77rDf9JS)
Supplement: supplementary_material [file NeurIPS_2025___Agentic_Recommender_System_Benchmark (3).pdf › NeurIPS_2025___Agentic_Recommender_System_Benchmark (3).pdf]

## 1 A Appendix

### 2 A.1 Broader Impacts

3 The benchmark and toolkit presented in this work are expected to advance the development of agentic  
4 recommender systems and bring significant positive societal implications. The improved contextual  
5 understanding of agentic recommender systems enables higher-quality personalized recommendations  
6 that can benefit diverse domains, including e-commerce, short-video platforms, etc. Furthermore,  
7 the standardized evaluation framework facilitates the development of more robust and adaptable  
8 recommendation systems that can better serve evolving user needs. Our platform can also provide a  
9 flexible foundation for incorporating ethical AI principles, such as fairness and privacy preservation,  
10 into future recommendation systems. These advancements collectively contribute to building more  
11 user-centric, explainable, and socially beneficial recommendation technologies.

### 12 A.2 Limitations

13 While AgentRecBench provides a comprehensive evaluation framework for agentic recommender  
14 systems, several limitations point to valuable directions for future work. First, the current benchmark  
15 primarily focuses on evaluating emerging agentic recommender systems, and we plan to incorporate  
16 more traditional and deep learning-based baselines for more thorough comparative analysis. Second,  
17 our environment currently operates on textual information, and we aim to extend it to incorporate  
18 multimodal data (e.g., images, videos) to better reflect real-world recommendation scenarios where  
19 agents need to process diverse content types. Finally, while the current framework evaluates single-  
20 agent systems, we plan to extend it to support the evaluation of multi-agent recommendation systems  
21 where collaborative or competitive agents interact to improve recommendation outcomes.

### 22 A.3 Supplemented experimental results of the cold-start recommendation tasks and 23 evolving-interest recommendation tasks

24 Tables 1 and 2 show the complementary experimental results of our task on DeepSeek V3 and  
25 GPT-4o-mini. Overall, our evaluation results on other mainstream models, such as DeepSeek V3 and  
26 GPT-4o-mini, demonstrate that the agent’s performance is consistent with the findings presented in  
27 the main text. Baseline666, DummyAgent, and RecHackers all exhibit strong performance, further  
28 validating the robustness and reliability of our evaluation method in accurately reflecting agent  
29 capabilities.

### 30 A.4 Case Study

31 We present the core workflows of the two agents, DummyAgent, and RecHackers in Figure 1, and  
32 2, respectively. Overall, these agents rely on similar types of information for the ranking process,  
33 although their specific implementations differ. The ranking decisions are primarily based on three  
34 key components: (1) historical user reviews, which reflect past preferences; (2) a list of candidate  
35 items to be ranked; and (3) detailed item information, which helps evaluate the relevance of each  
36 item to the user’s preferences.

37 A major innovation among these agents lies in item-side feature engineering. Notably, the Baseline666  
38 team employed platform-specific feature extraction methods, enabling a robust and adaptable ranking  
39 strategy across different data sources. For instance, on the Amazon platform, features such as item ID,  
40 name, star rating, number of reviews, and item description were extracted. On Yelp, they focused on  
41 core attributes like item ID, name, star rating, and review count. In contrast, the Goodreads platform  
42 required more diverse features, including author, publication year, and similar books.

43 Review-side feature engineering represents another critical component, aimed at identifying and  
44 extracting the most informative reviews to enrich the understanding of both user preferences and item  
45 characteristics. For example, the DummyAgent team implemented a platform-tailored strategy: on  
46 Yelp, they extracted not only the review text but also interactive attributes such as “useful,” “cool,”  
47 and “funny”; on Amazon, they incorporated publication dates and purchase verification indicators;  
48 and on Goodreads, in addition to the review text and ratings, they utilized metadata such as review  
49 date, number of votes, number of comments, and reading status.

Table 1: Performance comparison on cold-start recommendation tasks with the average HR@N metric (N=1,3,5).

| <b>DeepSeek-V3</b> |             |        |      |           |      |      |      |
|--------------------|-------------|--------|------|-----------|------|------|------|
| Category           | Method      | Amazon |      | Goodreads |      | Yelp |      |
|                    |             | User   | Item | User      | Item | User | Item |
| Agentic RS         | BaseAgent   | 16.3   | 14.0 | 22.3      | 16.2 | 4.0  | 4.0  |
|                    | CoTAgent    | 19.3   | 9.0  | 20.3      | 14.5 | 4.3  | 4.3  |
|                    | MemoryAgent | 15.3   | 11.0 | 16.7      | 15.5 | 4.3  | 4.3  |
|                    | CoTMemAgent | 16.7   | 12.0 | 16.7      | 15.5 | 3.7  | 4.3  |
|                    | Baseline666 | 50.3   | 48.7 | 38.7      | 49.5 | 1.3  | 2.7  |
|                    | DummyAgent  | 59.0   | 45.0 | 37.7      | 49.5 | 1.3  | 2.7  |
|                    | RecHackers  | 59.7   | 47.0 | 49.3      | 46.1 | 3.0  | 3.3  |
|                    | Agent4Rec   | 45.6   | 28.0 | 37.3      | 11.1 | 2.7  | 0.7  |
| <b>GPT-4o-mini</b> |             |        |      |           |      |      |      |
| Category           | Method      | Amazon |      | Goodreads |      | Yelp |      |
|                    |             | User   | Item | User      | Item | User | Item |
| Agentic RS         | BaseAgent   | 15.3   | 9.0  | 18.7      | 15.2 | 3.0  | 4.0  |
|                    | CoTAgent    | 17.0   | 9.3  | 20.0      | 15.5 | 2.7  | 4.3  |
|                    | MemoryAgent | 15.0   | 7.3  | 16.0      | 18.2 | 3.0  | 4.3  |
|                    | CoTMemAgent | 14.7   | 7.7  | 15.3      | 16.0 | 3.7  | 4.0  |
|                    | Baseline666 | 46.0   | 32.0 | 33.0      | 21.5 | 0.3  | 2.3  |
|                    | DummyAgent  | 36.7   | 30.7 | 32.7      | 24.6 | 0.3  | 3.3  |
|                    | RecHackers  | 39.0   | 36.3 | 37.7      | 33.3 | 1.3  | 3.3  |
|                    | Agent4Rec   | 36.0   | 20.3 | 39.3      | 7.1  | 0.7  | 1.3  |

Table 2: Performance comparison on evolving-interest recommendation tasks with the average HR@N metric (N=1,3,5).

| <b>DeepSeek-V3</b> |             |           |            |           |            |           |            |
|--------------------|-------------|-----------|------------|-----------|------------|-----------|------------|
| Category           | Method      | Amazon    |            | Goodreads |            | Yelp      |            |
|                    |             | Long Term | Short Term | Long Term | Short Term | Long Term | Short Term |
| Agentic RS         | BaseAgent   | 17.3      | 19.7       | 32.0      | 29.7       | 5.7       | 4.3        |
|                    | CoTAgent    | 17.7      | 16.0       | 24.0      | 16.3       | 3.3       | 3.0        |
|                    | MemoryAgent | 18.3      | 17.7       | 29.3      | 29.7       | 5.0       | 4.0        |
|                    | CoTMemAgent | 13.3      | 18.7       | 23.3      | 21.3       | 4.3       | 4.0        |
|                    | Baseline666 | 50.7      | 71.3       | 66.0      | 63.3       | 0.0       | 0.0        |
|                    | DummyAgent  | 65.0      | 65.7       | 66.7      | 60.7       | 10.3      | 6.3        |
|                    | RecHackers  | 64.3      | 68.0       | 68.7      | 66.3       | 9.3       | 7.7        |
|                    | Agent4Rec   | 34.0      | 46.3       | 41.3      | 42.7       | 10.0      | 6.0        |
| <b>GPT-4o-mini</b> |             |           |            |           |            |           |            |
| Category           | Method      | Amazon    |            | Goodreads |            | Yelp      |            |
|                    |             | Long Term | Short Term | Long Term | Short Term | Long Term | Short Term |
| Agentic RS         | BaseAgent   | 13.3      | 12.0       | 12.7      | 14.0       | 5.3       | 4.7        |
|                    | CoTAgent    | 13.3      | 11.7       | 12.7      | 13.0       | 5.3       | 4.7        |
|                    | MemoryAgent | 12.0      | 10.7       | 16.3      | 15.7       | 5.3       | 4.3        |
|                    | CoTMemAgent | 11.3      | 12.3       | 17.7      | 16.3       | 5.3       | 4.7        |
|                    | Baseline666 | 35.0      | 49.0       | 35.0      | 38.7       | 0.0       | 0.0        |
|                    | DummyAgent  | 34.7      | 48.0       | 42.7      | 31.3       | 4.0       | 2.3        |
|                    | RecHackers  | 39.7      | 46.3       | 53.7      | 44.3       | 5.7       | 2.0        |
|                    | Agent4Rec   | 24.0      | 34.7       | 32.7      | 35.3       | 7.0       | 4.3        |

50 In summary, the key design elements across these agents can be distilled into three core principles:  
 51 (1) effective workflows are built on a combination of user history, candidate items, item details,  
 52 and platform-specific features, all integrated through large language models (LLMs) to produce  
 53 rankings; (2) extracting representative, platform-specific item attributes is essential for enhancing  
 54 model performance; and (3) prioritizing reviews that are both highly relevant and information-rich is  
 55 crucial for improving ranking quality.

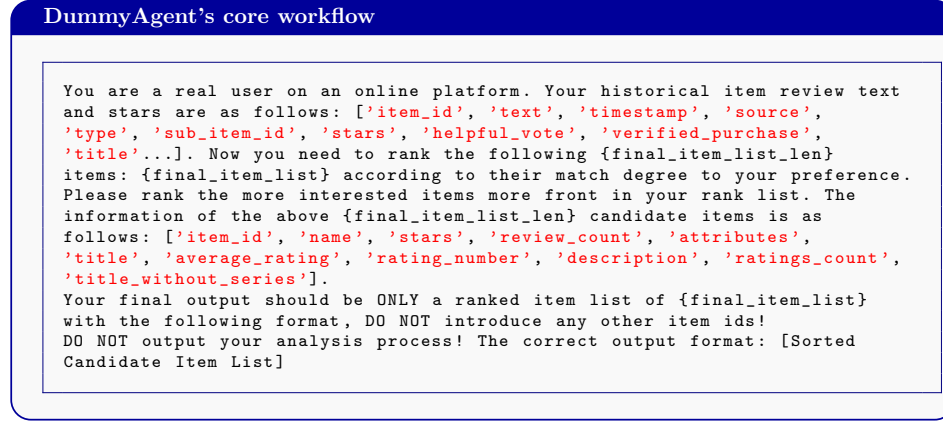

Figure 1: Illustration of the agentic workflow of a superior recommendation agent (DummyAgent), which conducts domain-adaptive item-side feature engineering to enhance personalization.

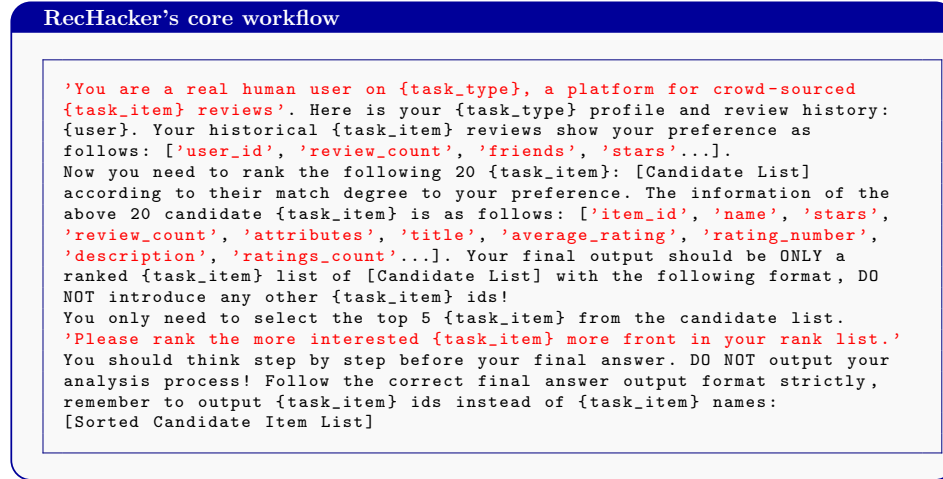

Figure 2: Illustration of the agentic workflow of a superior recommendation agent (RecHacker), which conducts domain-adaptive item-side feature engineering to enhance personalization.
